# Supplementary material for: MANF stimulates autophagy and restores mitochondrial homeostasis to treat autosomal dominant tubulointerstitial kidney disease in mice
Source: PubMed Central journal article supplement (PMC10576802; doi:10.1038/s41467-023-42154-0), 2023-10-14

## Supplementary Materials for

### **MANF stimulates autophagy and restores mitochondrial homeostasis to treat autosomal dominant tubulointerstitial kidney disease**

Yeawon Kim,<sup>1†</sup> Chuang Li,<sup>1†</sup> et al.

† These authors contributed equally

\*Corresponding author:

Ying Maggie Chen, MD., Ph.D., FASN  
Washington University School of Medicine  
Division of Nephrology, Campus Box 8126  
660 S. Euclid Ave.  
St. Louis, MO 63110  
Tel: 314-362-4629  
Email: [ychen32@wustl.edu](mailto:ychen32@wustl.edu)

**Supplementary Table 1. List of primary antibodies**

| Antibodies                                               | Source           | Identifier       | Clone #    | Dilution                   |
|----------------------------------------------------------|------------------|------------------|------------|----------------------------|
| mouse monoclonal anti- $\beta$ -actin-Peroxidase         | Sigma            | Cat# A3854       | AC-15      | 1:20,000                   |
| rabbit monoclonal anti-AMPK $\alpha$                     | Cell Signaling   | Cat# 5832        | D63G4      | 1:1,000                    |
| rabbit monoclonal anti-Phospho AMPK $\alpha$ (T172)      | Cell Signaling   | Cat# 50081       | D4D6D      | 1:1,000                    |
| rabbit polyclonal anti-ATF4                              | Santa Cruz       | Cat# sc-200      |            | 1:1,000                    |
| mouse monoclonal anti-ATF6                               | Novus            | Cat# NBP1-40256  | 70B1413.1  | 1:1,000                    |
| rabbit polyclonal anti-BIP                               | Proteintech      | Cat# 11587-1-AP  |            | 1:1,000 (WB), 1:50 (IF)    |
| rabbit polyclonal anti-BNIP3                             | Cell Signaling   | Cat# 3769        |            | 1:1,000                    |
| rabbit monoclonal anti-BNIP3L                            | Cell Signaling   | Cat# 12396       | D4R4B      | 1:1,000                    |
| rabbit polyclonal anti-Calnexin                          | Santa Cruz       | Cat# sc-11397    |            | 1:50 (IF)                  |
| rabbit polyclonal anti-Caspase 3                         | Cell Signaling   | Cat# 9662        |            | 1:1,000                    |
| mouse monoclonal anti-Caspase 9                          | Cell Signaling   | Cat# 9508        | C9         | 1:1,000                    |
| rabbit monoclonal anti-cleaved caspase 3                 | Cell Signaling   | Cat# 9664        | 5A1E       | 1:1,000                    |
| rabbit polyclonal anti-Collagen I                        | Abcam            | Cat# 34710       |            | 1:50 (IF)                  |
| rabbit polyclonal anti-COX IV                            | Cell Signaling   | Cat# 4844        |            | 1:1,000                    |
| goat polyclonal anti-CRELD2                              | R&D Systems      | Cat# AF3686      |            | 1:1,000                    |
| rat monoclonal anti-F4/80                                | Invitrogen       | Cat#14-4801-82   | BM8        | 1:50 (IF)                  |
| rabbit polyclonal anti-Fibronectin                       | Abcam            | Cat# ab2413      |            | 1:1,000 (WB), 1:50 (IF)    |
| rabbit polyclonal anti-FIS1                              | GeneTex          | Cat# GTX111010   |            | 1:1,000                    |
| rabbit monoclonal anti-Foxo3a                            | Cell Signaling   | Cat# 12829       | D19A7      | 1:1,000                    |
| rabbit monoclonal anti-FUNDC1                            | Cell Signaling   | Cat# 49240       | E2F4T      | 1:1,000                    |
| rabbit monoclonal anti-GAPDH                             | Cell Signaling   | Cat# 5174        | D16H11     | 1:5,000                    |
| mouse anti-GFP                                           | Roche            | Cat# 11814460001 | 7.1 & 13.1 | 1:1,000                    |
| rabbit monoclonal anti-IRF3                              | Cell Signaling   | Cat# 4302        | D83B9      | 1:1,000                    |
| rabbit monoclonal anti-phospho-IRF3 (S396)               | Cell Signaling   | Cat# 29047       | D6O1M      | 1:500                      |
| rabbit polyclonal anti-Laminin                           | Abcam            | Cat# ab11575     |            | 1:2,000                    |
| rabbit polyclonal anti-LC3A/B                            | Cell Signaling   | Cat# 4108        |            | 1:1,000                    |
| rabbit polyclonal anti-MANF                              | Abnova           | Cat# PAB13301    |            | 1:1,000 (WB), 1:100 (IF)   |
| goat polyclonal anti-MANF                                | R&D              | Cat# 3748        |            | 1:50 (IF)                  |
| rabbit monoclonal anti-Mitofusin2                        | Cell Signaling   | Cat# 9482        | D2D10      | 1:1,000                    |
| rabbit polyclonal anti-Phospho mTOR (S2481)              | Cell Signaling   | Cat# 2974        |            | 1:1,000                    |
| rabbit polyclonal anti-NF- $\kappa$ B p65                | Abcam            | Cat# ab16502     |            | 1:1,000                    |
| rabbit monoclonal anti-phospho-NF- $\kappa$ B p65 (S536) | Cell Signaling   | Cat# 3033        | 93H1       | 1:500                      |
| goat polyclonal anti-NGAL                                | R&D Systems      | Cat# AF1857      |            | 1:1,000                    |
| rabbit polyclonal anti-NKCC2                             | Alpha Diagnostic | Cat# NKCC21-A    |            | 1:50 (IF)                  |
| OXPPOS antibody cocktail                                 | Abcam            | Cat# ab110413    |            | 1:2,000                    |
| rabbit polyclonal anti-p62/SQSTM1                        | Cell Signaling   | Cat# 5114        |            | 1:1,000                    |
| mouse monoclonal anti-Parkin                             | Abcam            | Cat# ab77924     | PRK8       | 1:1,000                    |
| mouse monoclonal anti-PGC1a                              | Proteintech      | Cat# 66369-1-AP  | 1C1B2      | 1:1,000                    |
| rabbit polyclonal anti-PINK1                             | Abcam            | Cat# ab23707     |            | 1:1,000                    |
| mouse monoclonal anti-Smooth muscle actin                | Sigma            | Cat# A2547       | 1A4        | 1:1,000 (WB), 1:50 (IF)    |
| rabbit anti-mouse monoclonal anti-STING                  | Cell Signaling   | Cat# 50494       | D1V5L      | 1:1,000                    |
| rabbit anti-human monoclonal anti-STING                  | Cell Signaling   | Cat# 13647       | D2P2F      | 1:1,000                    |
| rabbit monoclonal anti-TBK1                              | Cell Signaling   | Cat# 3504        | D1B4       | 1:1,000                    |
| rabbit monoclonal anti-phospho-TBK1 (S172)               | Cell Signaling   | Cat# 5483        | D52C2      | 1:500                      |
| rabbit anti-TFAM                                         | Sigma            | Cat# SAB1401383  |            | 1:1,000                    |
| rat monoclonal anti-Uromodulin                           | R&D Systems      | Cat# MAB5175     | 774056     | 1:1,000 (WB), 1:50 (IF)    |
| rabbit anti-Uromodulin                                   | Alfa Aesar       | Cat# J65429      |            | 1:1,000                    |
| sheep polyclonal anti-Uromodulin, Biotin                 | R&D Systems      | Cat# BAF5175     |            | 4 ug/mouse (TAL isolation) |
| mouse monoclonal anti-human Uromodulin                   | RayBiotech       | Cat# 119-13298   | 10.32      | 1:1,000 (WB), 1:50 (IF)    |
| rabbit polyclonal anti-XBP1s                             | BioLegend        | Cat# 619502      |            | 1:1,000                    |

**Supplementary Table 2. Q-PCR primers for kidneys and TALs**

| Gene name        | Forward primer           | Reverse primer            |
|------------------|--------------------------|---------------------------|
| <i>18S rRNA</i>  | GTAACCCGTTGAACCCATT      | CCATCCAATCGGTAGTAGCG      |
| <i>Acta2</i>     | AGCCATCTTTCATTGGGATGGA   | TACCCCTGACAGGACGTTG       |
| <i>Actb</i>      | CAGCCTTCCTTCTTGGGTAT     | GGTCTTTACGGATGTCAACG      |
| <i>Atg5</i>      | AGCCAGGTGATGATTCACGG     | GGCTGGGGGACAATGCTAA       |
| <i>Atg7</i>      | GTTTCGCCCCCTTTAATAGTGC   | TGAACTCCAACGTCAAGCGG      |
| <i>Becn1</i>     | TGAAATCAATGCTGCCTGGG     | CCAGAACAGTATAACGGCAACTCC  |
| <i>Bnip3</i>     | TCCTGGGTAGAACTGCACTTC    | GCTGGGCATCCAACAGTATTT     |
| <i>Ccl2</i>      | TTAAAAACCTGGATCGGAACCAA  | GCATTAGCTTCAGATTTACGGGT   |
| <i>Coll1a1</i>   | AGACATGTTTCAGCTTTGTGGAC  | GCAGCTGACTTCAGGGATG       |
| <i>Fn1</i>       | CCAGAAACAGATGCAACGAT     | GCAGACACACTGAAGCAGGT      |
| <i>Foxo3</i>     | CTGGGGGAACCTGTCCTATG     | TCATTCTGAACGCGCATGAAG     |
| <i>Gabarapl1</i> | GGACCACCCCTTCGAGTATC     | CCTCTTATCCAGATCAGGGACC    |
| <i>Gapdh</i>     | TGTAGACCATGTAGTTGAGGTCA  | AGGTCGGTGTGAACGGATTTG     |
| <i>Icam1</i>     | AGCACCTCCCCACCTACTTT     | AGCTTGCACGACCCCTTCTAA     |
| <i>IL1b</i>      | GCACTACAGGCTCCGAGATGAAC  | TTGTCTGTTGCTTGGTTCTCCTTGT |
| <i>IL6</i>       | TAGTCCTTCTACCCCAATTTCC   | TTGGTCCTTAGCCACTCCTTC     |
| <i>Manf</i>      | CCTCAAAGACAGAGATGTCACA   | TAGTAGCACAACCGATTCTC      |
| <i>Map1lc3b</i>  | TTATAGAGCGATAACAAGGGGGAG | TTATAGAGCGATAACAAGGGGGAG  |
| <i>mt-Co1</i>    | GCCCCAGATATAGCATTCCC     | GTTCATCCTGTTCTGCTCC       |
| <i>mt-Cytb</i>   | AGTAGACAAAGCCACCTTGA     | CCGCGATAATAAATGGTAAG      |
| <i>mt-Nd4</i>    | GCCTCACATCATCACTCCTATT   | GGCTATAAGTGGGAAGACCATT    |
| <i>mt-Rnr2</i>   | GTTACCCTAGGGATAACAGCGC   | GATCCAACATCGAGGTCGTAAACC  |
| <i>Pink1</i>     | CACACTGTTCTCGTTATGAAGA   | CTTGAGATCCCGATGGGCAAT     |
| <i>Sqstm1</i>    | AGGATGGGGACTTGGTTGC      | TCACAGATCACATTGGGGTGC     |
| <i>Tfam</i>      | GAGCAGCTAACTCCAAGTCAG    | GAGCCGAATCATCCTTTGCCCT    |
| <i>Tgfb1</i>     | TGGAGCAACATGTGGAAGTC     | CAGCAGCCGGTTACCAAG        |
| <i>Tnf</i>       | GGAAGTGGCAGAAGAGGCACTC   | GCAGGAATGAGAAGAGGCTGAGAC  |
| <i>Ulk1</i>      | AAGTTCGAGTTCTCTCGCAAG    | CGATGTTTTCTGCTTTAGTTCC    |

**Supplementary Table 3. Q-PCR primers for stably transduced HEK 293 cells**

| Gene name         | Forward primer          | Reverse primer          |
|-------------------|-------------------------|-------------------------|
| <i>18S rRNA</i>   | CTCAACACGGGAAACCTCAC    | CGCTCCACCAACTAAGAACG    |
| <i>CCL2</i>       | CAGCCAGATGCAATCAATGCC   | TGGAATCCTGAACCCACTTCT   |
| <i>GAPDH</i>      | GTCTCCTCTGACTTCAACAGCG  | ACCACCCTGTTGCTGTAGCCAA  |
| <i>ICAM1</i>      | ATGCCCAGACATCTGTGTCC    | GGGGTCTCTATGCCCAACAA    |
| <i>IL1B</i>       | AGCTACGAATCTCCGACCAC    | CGTTATCCCATGTGTGCGAAGAA |
| <i>IL6</i>        | ACTCACCTCTTCAGAACGAATTG | CCATCTTTGGAAGGTTCAAGTTG |
| <i>MT-CO1</i>     | GAGCCTCCGTAGACCTAACC    | TGAGGTTGCGGTCTGTTAGT    |
| <i>SQSTM1/p62</i> | GCACCCCAATGTGATCTGC     | CGCTACACAAGTCGTAGTCTGG  |
| <i>TNFA</i>       | CCTCTCTCTAATCAGCCCTCTG  | GAGGACCTGGGAGTAGATGAG   |
| <i>UMOD</i>       | GCGTACTGCACAGACCCACAG   | GTCATTGAAGCCCGAGCACCG   |

**Supplementary Table 4. PCR primers for genotyping**

| Allele                       | Forward primer                     | Reverse primer                                                  |
|------------------------------|------------------------------------|-----------------------------------------------------------------|
| P8TA                         | CCATGTCTAGACTGGACAAGA              | CTCCAGGCCACATATGATTAG                                           |
| <i>Umod</i> <sup>DEL/+</sup> | TTTACAGGGGATGGTTGGTACTGTGAG<br>TGC | TCGAGGGATGAGAGCCATTGAGCCACAT<br>GG                              |
| TET-MANF                     | ATCCACGCTGTTTTGACCTC               | ACGCAGGAGTTTTGATGGAC                                            |
| MANF <sup>fl/fl</sup>        | TGGAGTGAGCACAACCTCAGG              | CTCAGGTCCTCCACAAGAGC                                            |
| <i>Umod</i> <sup>CRE/+</sup> | AAGCAGAAAACCTGGTGTGG               | ATGCCAACTTGTTTTTGTATGG (WT);<br>ACCCCTAGGAATGCTCGTCAAG (Mutant) |

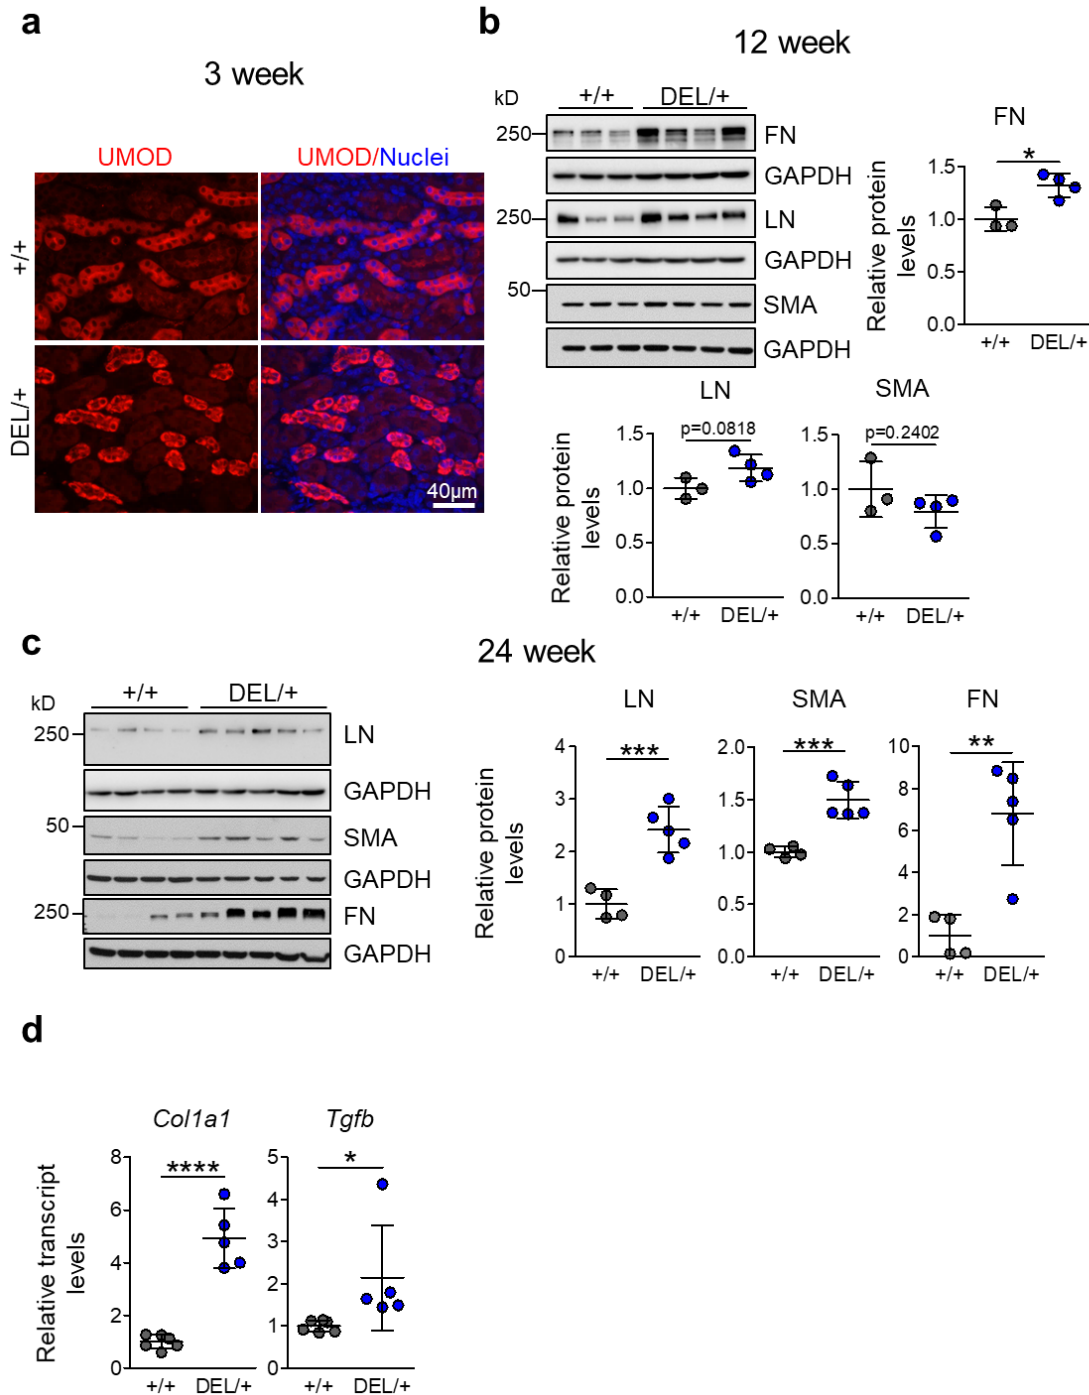

**Supplementary Fig. 1 Generation of a mouse model that recapitulates human ADTKD-UMOD.**

**a** Representative IF images of paraffin kidney sections stained for UMOD (red) with a nuclear counterstain (Hoechst 33342, blue) at 3 weeks. Scale bar, 40  $\mu$ m. **b** WBs of whole-kidney lysates from *Umod*<sup>+/+</sup> ( $n = 3$ ) and *Umod*<sup>DEL/+</sup> ( $n = 4$ ) mice at 12 weeks to detect FN, LN and SMA with densitometry analysis. Two-tailed *t*-test, Mean  $\pm$  SD. \* $p = 0.0131$ . **c** Representative immunoblots of whole-kidney lysates from *Umod*<sup>+/+</sup> ( $n = 4$ ) and *Umod*<sup>DEL/+</sup> ( $n = 5$ ) mice at 24 weeks to detect LN, SMA and FN with densitometry analysis. Two-tailed *t*-test, Mean  $\pm$  SD. \*\*\* $p = 0.0008$  (for LN), \*\*\* $p = 0.0009$  (SMA), \*\* $p = 0.0031$  (FN). **d** Quantitative RT-PCR analysis of relative transcript levels of *Col1a1* and *Tgfb* in whole kidneys from *Umod*<sup>+/+</sup> ( $n = 6$ ) and *Umod*<sup>DEL/+</sup> ( $n = 5$ ) mice at 24 weeks. Gene expression was normalized to 18s. Two-tailed *t*-test, Mean  $\pm$  SD. \*\*\*\* $p < 0.0001$ , \* $p = 0.0495$ . Source data are provided as a source data file.

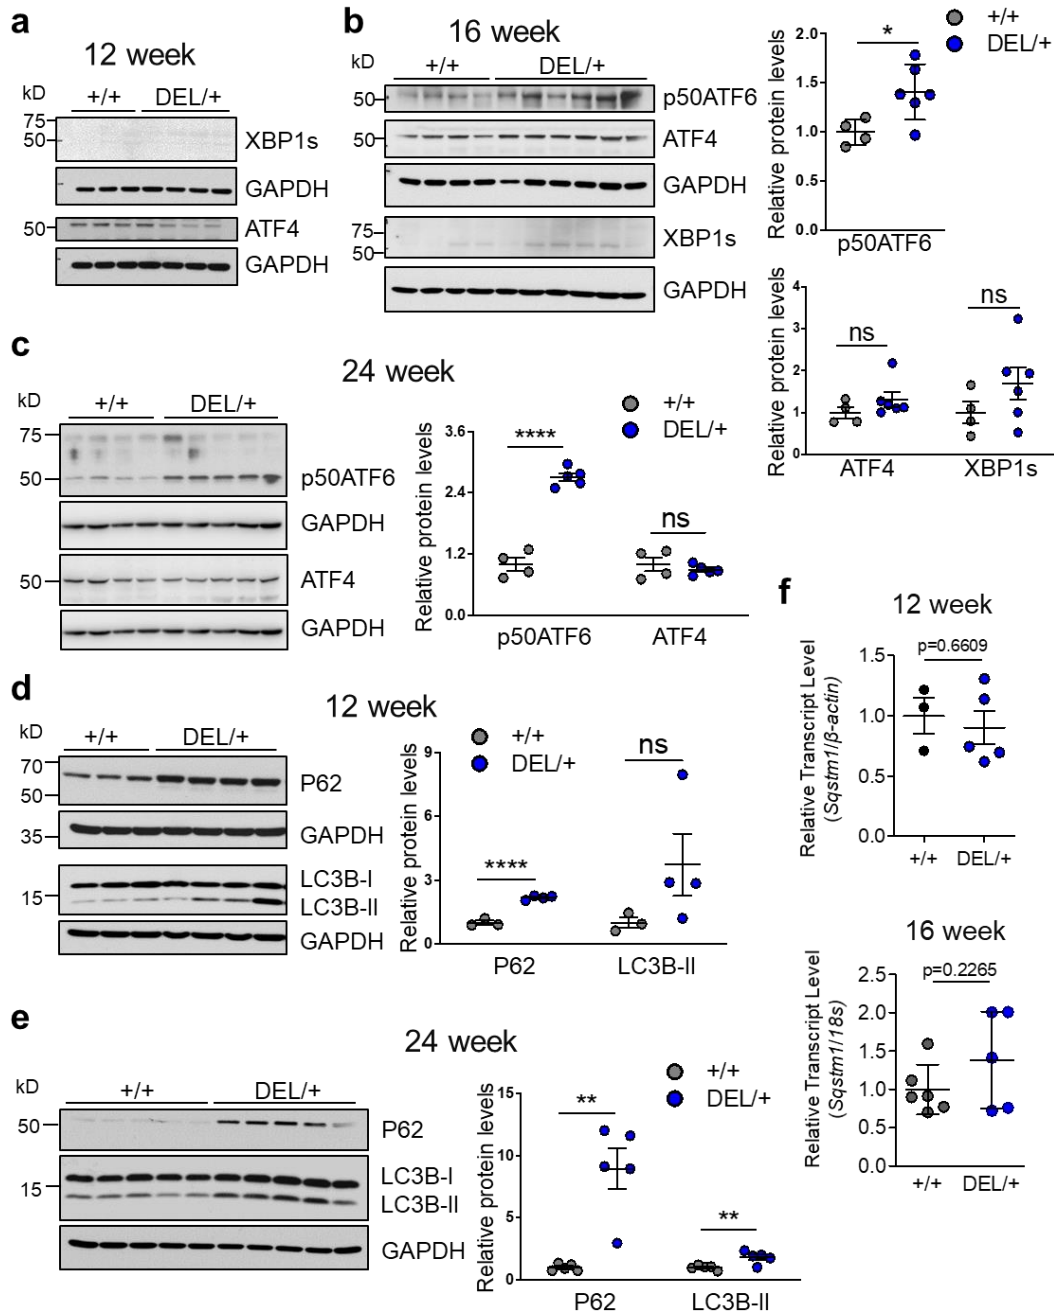

**Supplementary Fig. 2 ER stress activation and impaired autophagy in the mouse model of ADTKD-UMOD.**

**a** Whole-kidney lysates from *Umod*<sup>+/+</sup> and *Umod*<sup>DEL/+</sup> mice at 12 weeks were examined by WBs for XBP1s and ATF4. *n* = 3-4 mice/genotype. **b** Whole-kidney lysates from *Umod*<sup>+/+</sup> (*n* = 4) and *Umod*<sup>DEL/+</sup> (*n* = 6) mice at 16 weeks were examined by WBs for p50ATF6, ATF4 and XBP1s with densitometry analysis. Two-tailed *t*-test, Mean  $\pm$  SD. \**p* = 0.0283 (p50ATF6); *p* = 0.239 (for ATF4, ns, not significant), 0.2136 (for XBP1s, ns). **c** Whole-kidney lysates from *Umod*<sup>+/+</sup> (*n* = 4) and *Umod*<sup>DEL/+</sup> (*n* = 5) mice at 24 weeks were examined by WBs for p50ATF6 and ATF4 with densitometry analysis. Two-tailed *t*-test, Mean  $\pm$  SD. \*\*\*\**p* < 0.0001; *p* = 0.4388 (ns). **d** WB of whole-kidney lysates from *Umod*<sup>+/+</sup> (*n* = 3) and *Umod*<sup>DEL/+</sup> (*n* = 4) mice to detect the autophagy mediators P62 and LC3B at 12 weeks with densitometry analysis. Two-tailed *t*-test, Mean  $\pm$  SD. \*\*\*\**p* < 0.0001; *p* = 0.179 (ns). **e** WB of whole-kidney lysates from *Umod*<sup>+/+</sup> (*n* = 5) and *Umod*<sup>DEL/+</sup> (*n* = 5) mice to detect P62 and LC3B at 24 weeks with densitometry analysis. Two-tailed *t*-test, Mean  $\pm$  SD. \*\**p* = 0.0012 (for P62), 0.0086 (LC3B-II). **f** Quantitative PCR of *p62* from *Umod*<sup>+/+</sup> (*n* = 3, 6 for weeks 12, 16) and *Umod*<sup>DEL/+</sup> (*n* = 5, 5 for weeks 12, 16) TALs at 12 and 16 weeks. Two-tailed *t*-test, Mean  $\pm$  SD. Source data are provided as a source data file.

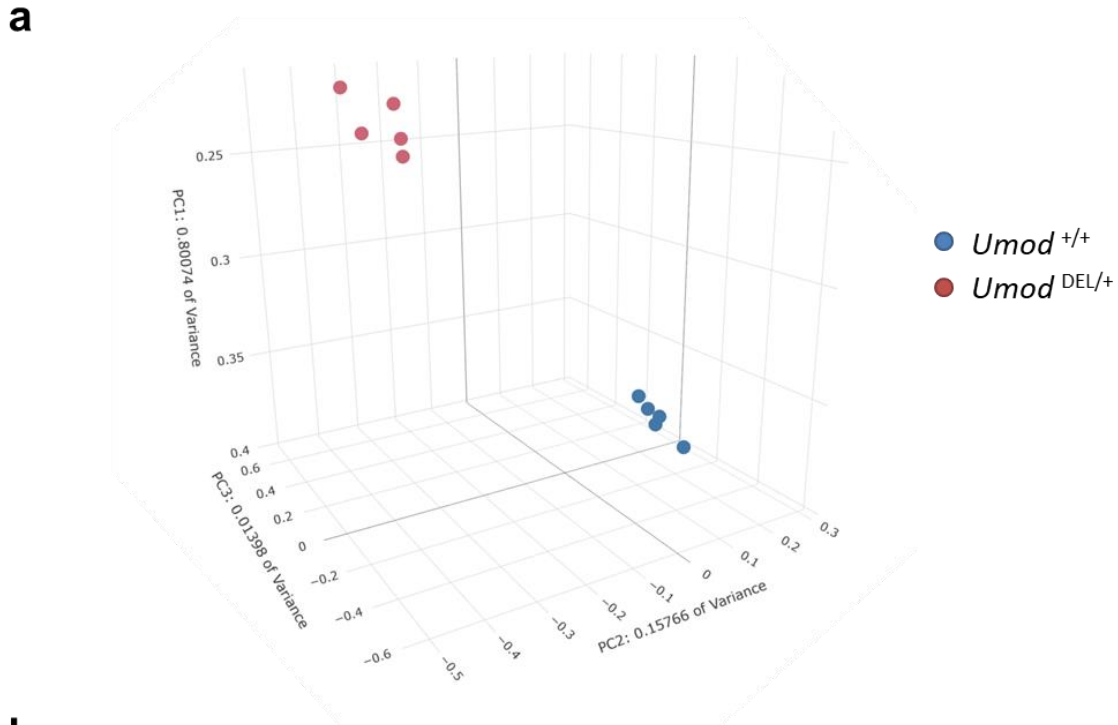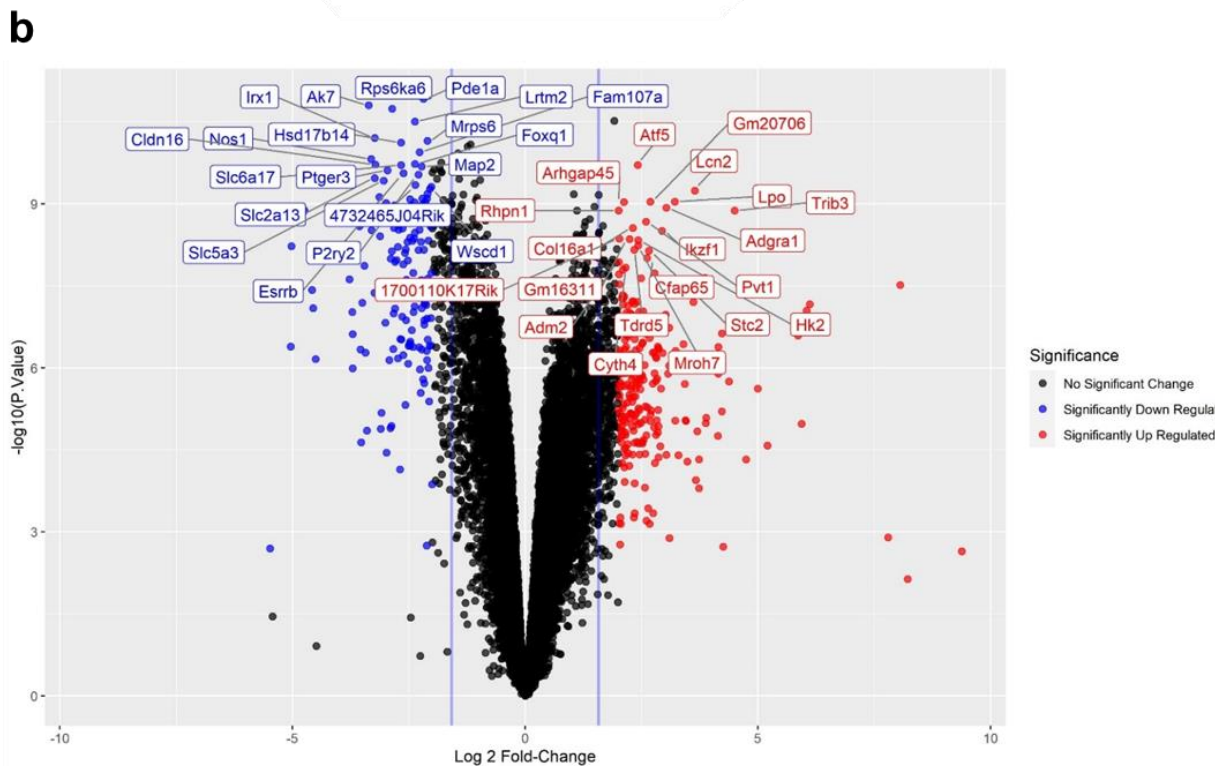

**Supplementary Fig. 3 The altered transcriptional profile by the *Umod* mutant allele in murine TAL cells at 16 weeks.**

**a** Multidimensional principal component analysis of RNAseq data obtained from *Umod*<sup>DEL/+</sup> ( $n = 5$ ) and WT ( $n = 5$ ) TALs at 16 weeks. **b** Volcano plot of log<sub>2</sub> fold-change and  $-\log_{10}$  scale  $p$  values, derived by Limma analysis for differential gene expression (Benjamini-Hochberg adjusted  $p$  values  $\leq 0.05$ ). 9566 were differentially expressed between mutant and WT TAL cells (FDR  $\leq 0.05$ ). Out of these transcripts, 244 were up-regulated (red) and 149 were down-regulated (blue) by 4-fold or more. The top 20 most significantly differentiated genes were labeled. Source data are provided as a source data file.

## TALs 16 week

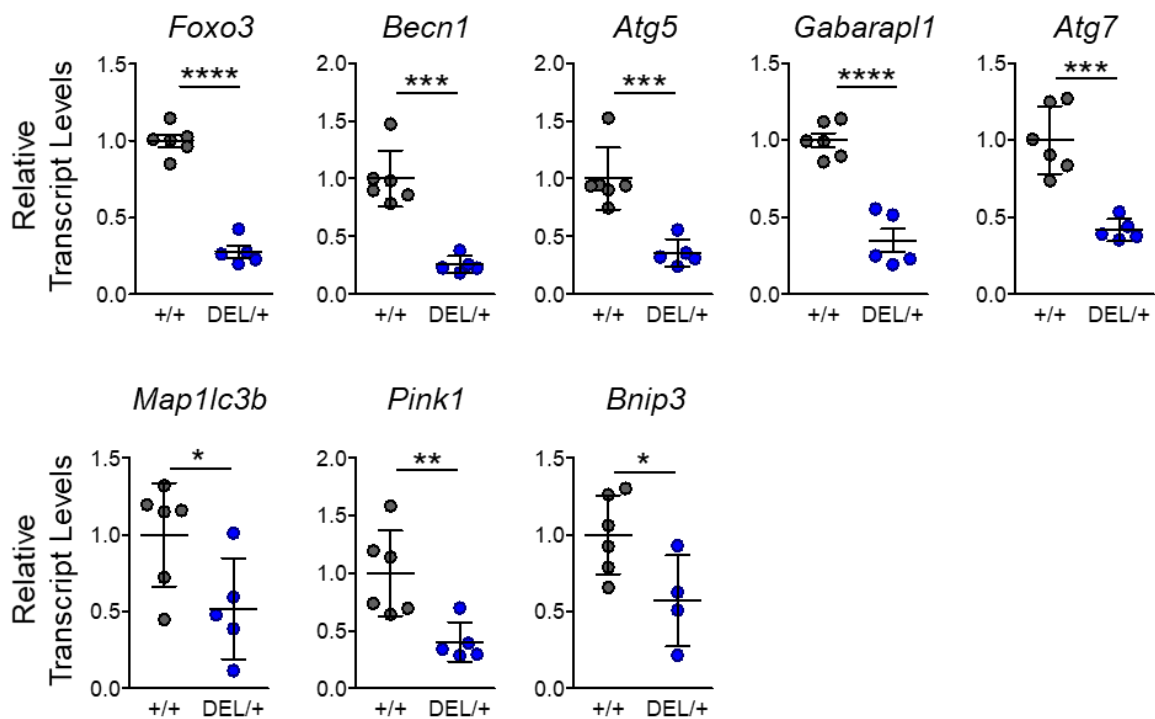

**Supplementary Fig. 4 Quantitative PCR validation of RNA-seq results in TAL cells related to autophagy suppression at 16 weeks.**

Quantitative PCR of a panel of autophagy-related genes from isolated *Umod*<sup>+/+</sup> ( $n = 6$ ) and *Umod*<sup>DEL/+</sup> ( $n = 5$  except  $n = 4$  for *Bnip3*) TALs at 16 weeks. Gene expression was normalized to 18s. Two-tailed *t*-test, Mean  $\pm$  SD. \* $p = 0.0408$  (for *Map1lc3b*), 0.0406 (*Bnip3*); \*\* $p = 0.0093$  (*Pink1*); \*\*\* $p = 0.00011$  (for *Becn1*), 0.0008 (*Atg5*), 0.0003 (*Atg7*); \*\*\*\* $p < 0.0001$  (*Foxo3*, *Gabarapl1*). Source data are provided as a source data file.



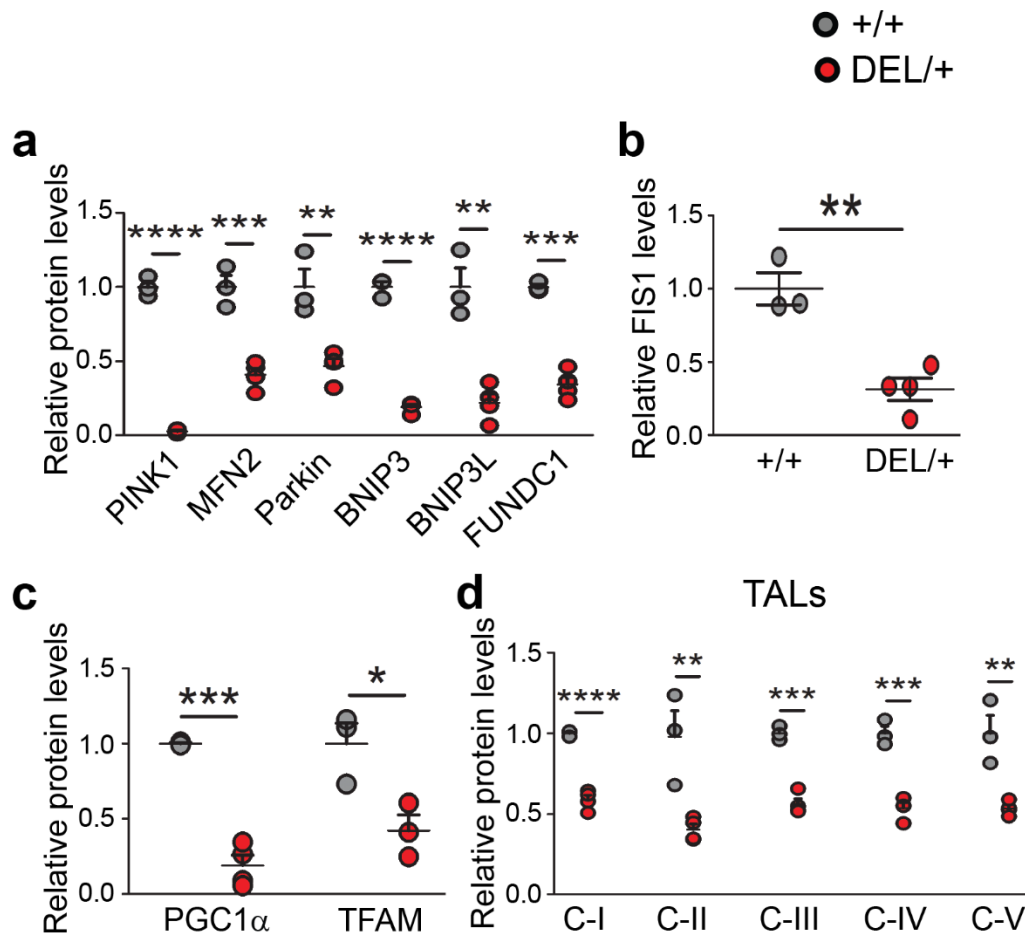

**Supplementary Fig. 5 Defective mitophagy, fission and mitochondrial biogenesis in the mutant TALs (densitometry analysis for Fig. 3).**

**a** Densitometry analysis of PINK1, MFN2, Parkin, BNIP3, BNIP3L and FUNDC1 for Fig. 3b. *Umod*<sup>+/+</sup>: *n* = 3, *Umod*<sup>DEL/+</sup>: *n* = 4. Two-tailed *t*-test, Mean  $\pm$  SD. \*\**p* = 0.0065 (for Parkin), 0.0018 (BNIP3L); \*\*\**p* = 0.00096 (for MFN2), 0.00011 (FUNDC1); \*\*\*\**p* < 0.0001 (PINK1, BNIP3). **b** Densitometry analysis of FIS1 for Fig. 3c. *Umod*<sup>+/+</sup>: *n* = 3, *Umod*<sup>DEL/+</sup>: *n* = 4. Two-tailed *t*-test, Mean  $\pm$  SD. \*\**p* = 0.0031. **c** Densitometry analysis of PGC1 $\alpha$  and TFAM for Fig. 3d. *Umod*<sup>+/+</sup>: *n* = 3, *Umod*<sup>DEL/+</sup>: *n* = 4 (for PGC1 $\alpha$ ) and *n* = 3 (TFAM). Two-tailed *t*-test, Mean  $\pm$  SD. \**p* = 0.027; \*\*\**p* = 0.0002. **d** Densitometry analysis of protein expression levels of mitochondrial respiratory complexes I-V for TALs in Fig. 3f. *Umod*<sup>+/+</sup>: *n* = 3, *Umod*<sup>DEL/+</sup>: *n* = 4. Two-tailed *t*-test, Mean  $\pm$  SD. \*\**p* = 0.0099 (for C-II), 0.0051 (C-V); \*\*\**p* = 0.0002 (for C-III), 0.0004 (C-IV); \*\*\*\**p* < 0.0001 (C-I). Source data are provided as a source data file.

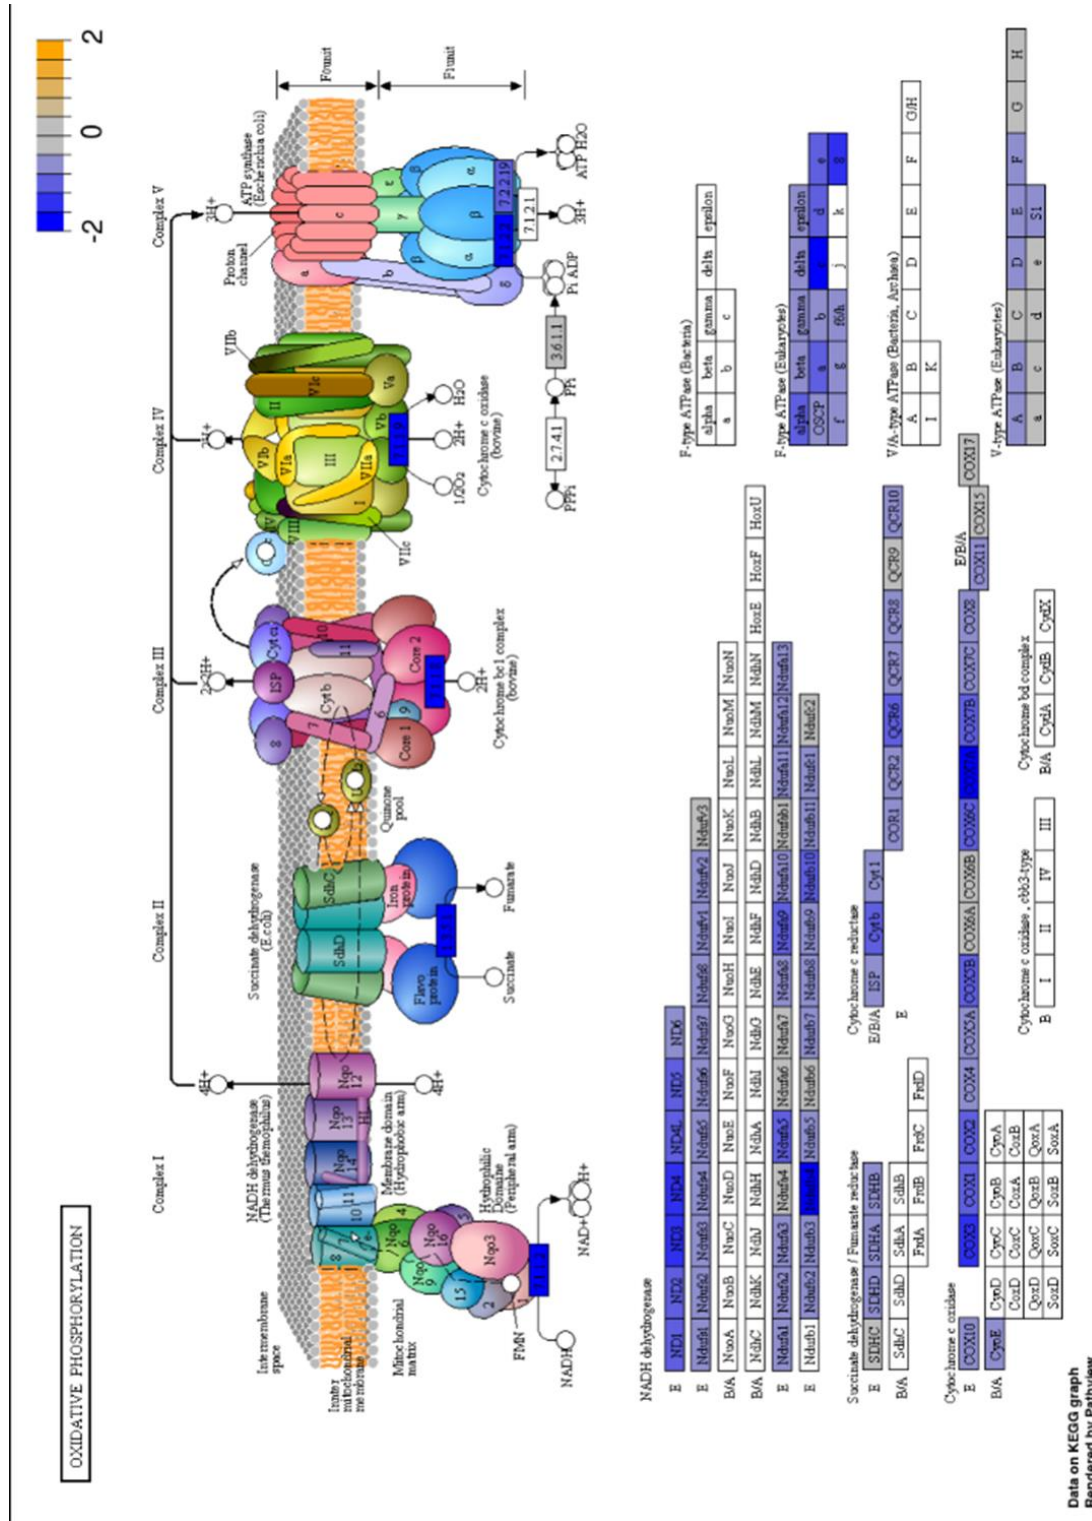

**Supplementary Fig. 6 KEGG pathway analysis of mitochondrial respiratory complexes in *Umod*<sup>DEL/+</sup> TALs compared with *Umod*<sup>+/+</sup> TALs at 16 weeks.**

The KEGG pathway depicted downregulation of all five ETCs in the mutant TALs at 16 weeks. Color indicates the magnitude of gene expression changes. The most upregulated genes are highlighted in orange, whereas the most downregulated genes are in blue.

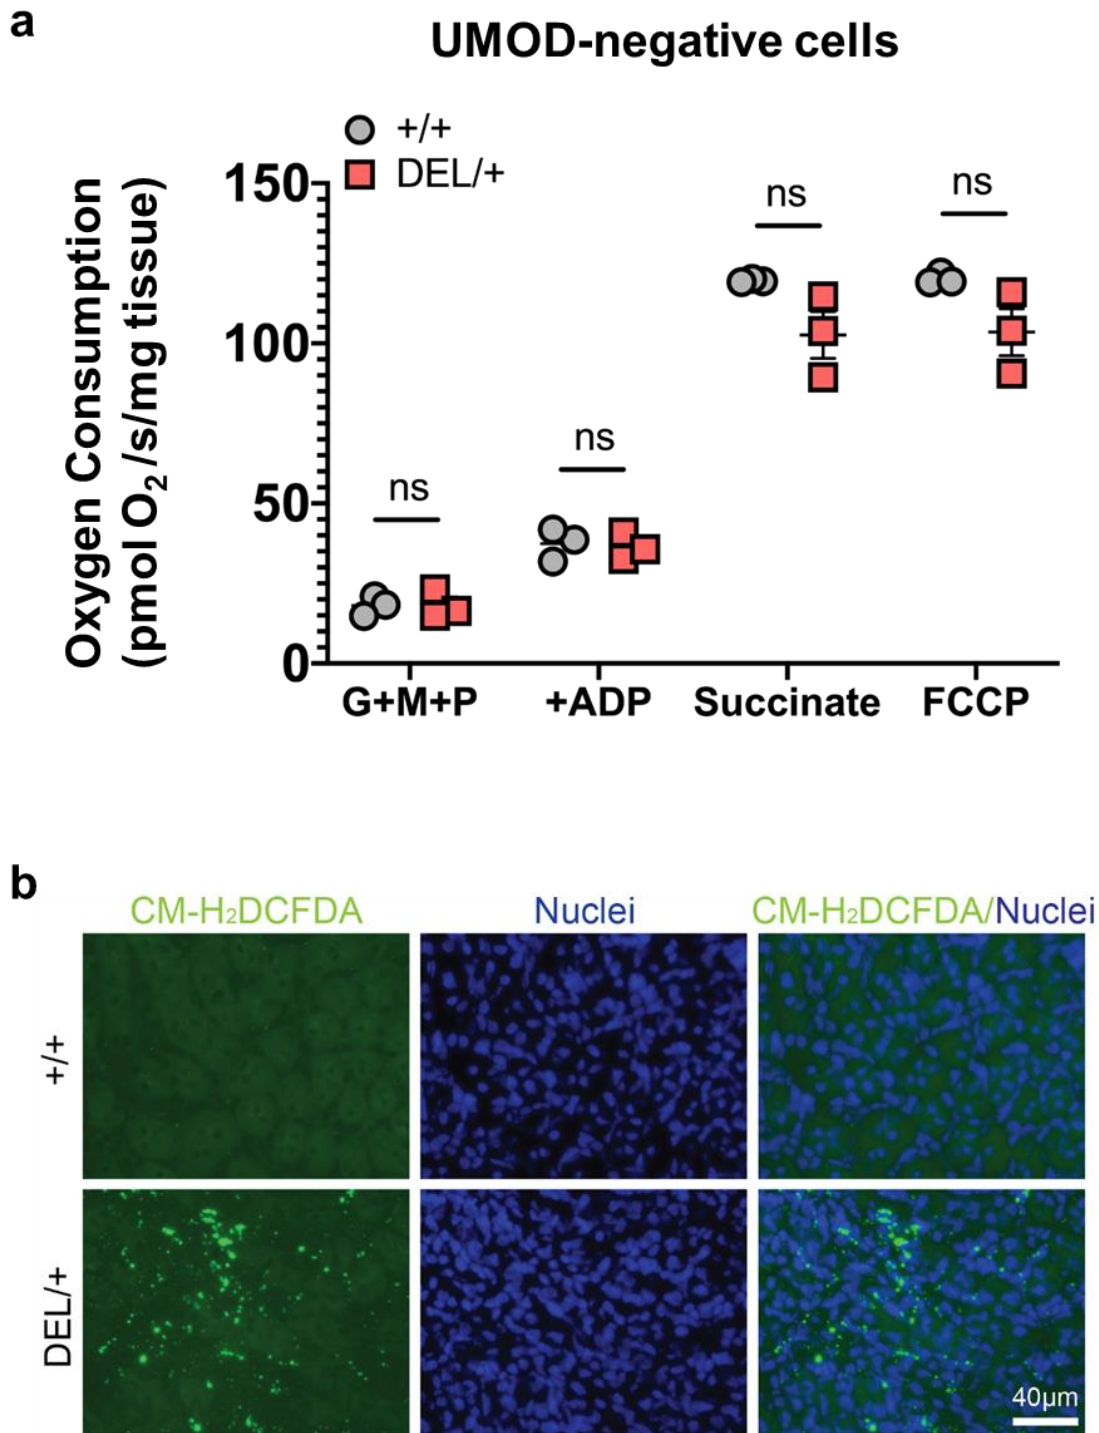

**Supplementary Fig. 7 Mitochondrial respiratory function in UMOD<sup>-</sup> cells and ROS accumulation in *Umod*<sup>+/+</sup> and *Umod*<sup>DEL/+</sup> kidneys at 16 weeks.**

**a** Measurement of mitochondrial respiration using an OROBOROS Oxygraph system in permeabilized UMOD-negative cells from *Umod*<sup>+/+</sup> ( $n = 3$ ) and *Umod*<sup>DEL/+</sup> ( $n = 3$ ) kidneys at 16 weeks following sequential additions of glutamate, malate and pyruvate (G+M+P); adenosine diphosphate (ADP); succinate and FCCP. Two-tailed  $t$ -test, Mean  $\pm$  SD.  $p = 0.9693$  (for G+M+P, ns), 0.802 (ADP, ns), 0.0815 (Succinate, ns), 0.0875 (FCCP, ns). **b** Representative images of ROS staining with nuclei counterstain (blue) on WT and DEL/+ frozen kidney sections at age 16 weeks by utilizing the ROS probe CM-H<sub>2</sub>DCFDA. Source data are provided as a source data file.

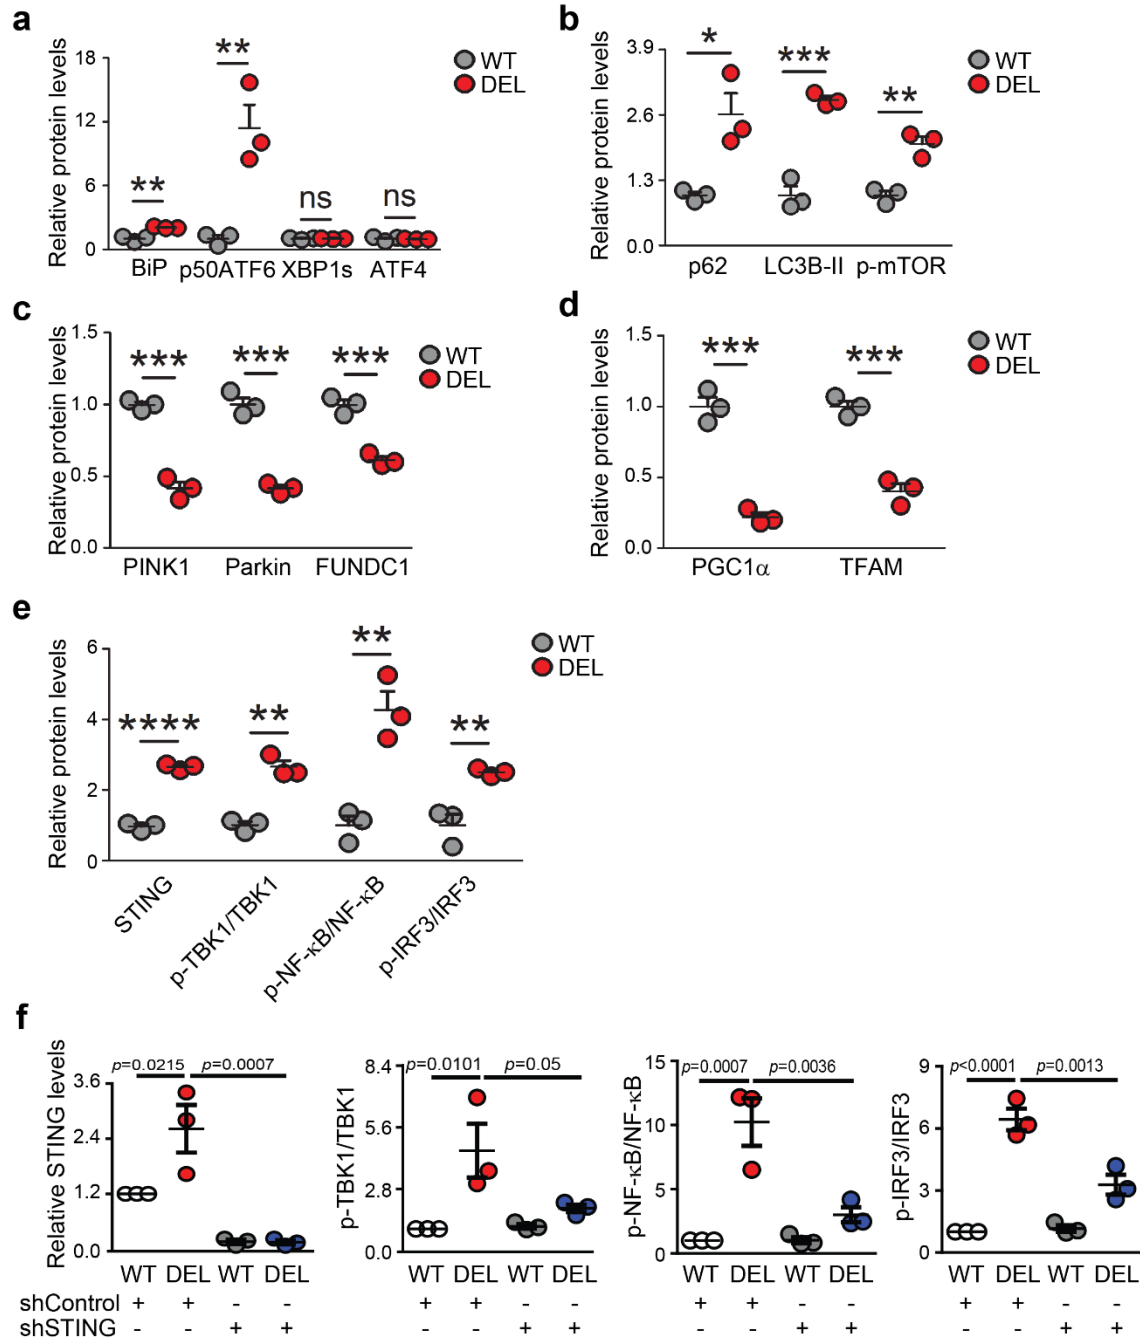

**Supplementary Fig. 8 Cytosolic leak of mtDNA activates STING signaling by utilizing stable HEK 293 cell line expressing N-terminal GFP-tagged WT or H177-R185 del UMOD (densitometry analysis for Fig. 5).**

**a** Densitometry analysis of BiP, p50ATF6, XBP1s and ATF4 for Fig. 5e.  $n = 3$ /genotype. Two-tailed  $t$ -test, Mean  $\pm$  SD. \*\* $p = 0.0028$  (for BiP),  $0.0093$  (p50ATF6);  $p = 0.8687$  (for XBP1s, ns),  $p = 0.8218$  (ATF4, ns). **b** Densitometry analysis of p62, LC3B-II and p-mTOR for Fig. 5f.  $n = 3$ /genotype. Two-tailed  $t$ -test, Mean  $\pm$  SD. \* $p = 0.0187$ ; \*\* $p = 0.0037$ ; \*\*\* $p = 0.0006$ . **c** Densitometry analysis of PINK1, Parkin and FUNDC1 for Fig. 5h.  $n = 3$ /genotype. Two-tailed  $t$ -test, Mean  $\pm$  SD. \*\*\* $p = 0.0003$  (for PINK1),  $0.0003$  (Parkin),  $0.0009$  (FUNDC1). **d** Densitometry analysis of PGC1 $\alpha$  and TFAM for Fig. 5i.  $n = 3$ /genotype. Two-tailed  $t$ -test, Mean  $\pm$  SD. \*\*\* $p = 0.0004$  (for PGC1 $\alpha$ ),  $0.0009$  (TFAM). **e** Densitometry analysis of STING, p-TBK1/TBK1, p-NF- $\kappa$ B/NF- $\kappa$ B and p-IRF3/IRF3 for Fig. 5k.  $n = 3$ /genotype. Two-tailed  $t$ -test, Mean  $\pm$  SD. \*\* $p = 0.0011$  (for p-TBK1/TBK1),  $0.0049$  (p-NF- $\kappa$ B/NF- $\kappa$ B),  $0.008$  (p-IRF3/IRF3); \*\*\*\* $p < 0.0001$  (STING). **f** Densitometry analysis of STING, p-TBK1/TBK1, p-NF- $\kappa$ B/NF- $\kappa$ B and p-IRF3/IRF3 in WT and DEL cells treated with shControl or shSTING for Fig. 5n.  $n = 3$ /group. One-way ANOVA with Tukey's multiple comparisons, Mean  $\pm$  SD. Source data are provided as a source data file.

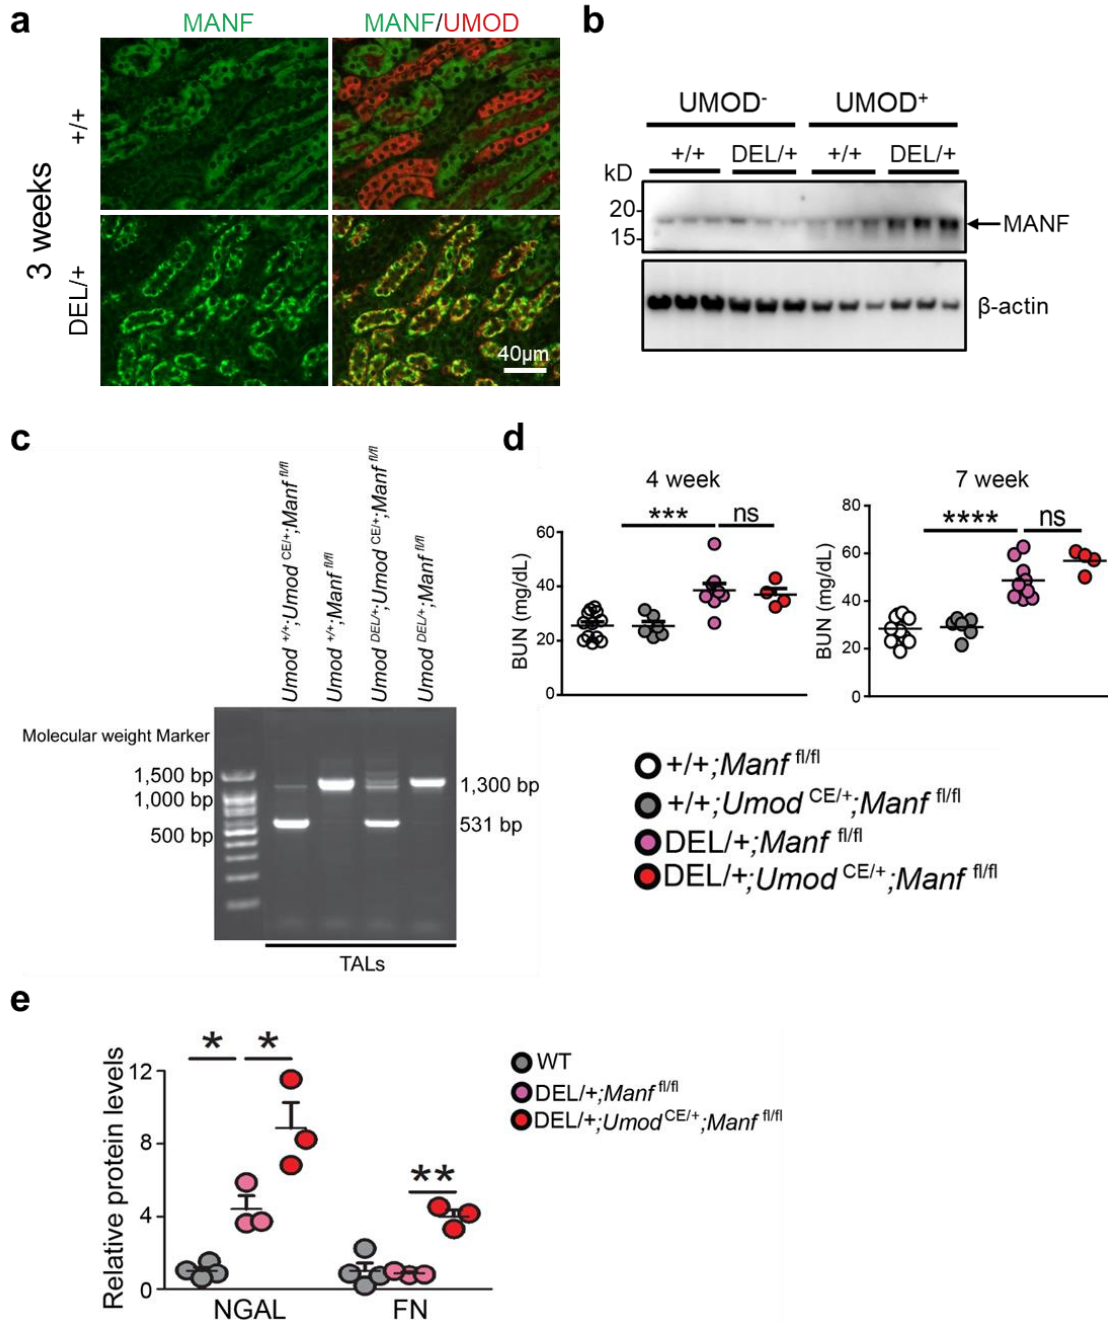

**Supplementary Fig. 9 Loss of MANF in TALs deteriorates autophagy suppression and kidney fibrosis in ADTKD.**

**a** Double IF staining for MANF (green) and UMOD (red) on paraffin kidney sections from *Umod*<sup>+/+</sup> and *Umod*<sup>DEL/+</sup> mice at 3 weeks of age. Scale bar, 40  $\mu$ m. **b** WB analysis of MANF in UMOD<sup>-</sup> and UMOD<sup>+</sup> cells isolated from *Umod*<sup>+/+</sup> and *Umod*<sup>DEL/+</sup> mice at 16 weeks of age.  $n = 3$  mice/group. **c** PCR results of genomic DNAs from isolated TALs of the indicated genotypes at 12 weeks. Forward primer: 5'-TGG AGT GAG CAC AAC TCA GG-3'; Reverse primer: 5'-TGC CATGGT GAT GCT GTA AC-3'. **d** BUN measurements at 4 and 7 weeks. *Umod*<sup>+/+</sup>; *Manf*<sup>fl/fl</sup>:  $n = 12$ , *Umod*<sup>+/+</sup>; *Umod*<sup>CE/+</sup>; *Manf*<sup>fl/fl</sup>:  $n = 6$ , *Umod*<sup>DEL/+</sup>; *Manf*<sup>fl/fl</sup>:  $n = 9$ , *Umod*<sup>DEL/+</sup>; *Umod*<sup>CE/+</sup>; *Manf*<sup>fl/fl</sup>:  $n = 4$ . One-way ANOVA with Tukey's multiple comparisons, Mean  $\pm$  SD. At 4 weeks, \*\*\* $p = 0.001$ ;  $p = 0.9687$  (ns); At 7 weeks, \*\*\*\* $p < 0.0001$ ;  $p = 0.1348$  (ns). **e** Densitometry analysis of NGAL and FN for Fig. 6i. WT:  $n = 4$ , *Umod*<sup>DEL/+</sup>; *Manf*<sup>fl/fl</sup>:  $n = 3$ , *Umod*<sup>DEL/+</sup>; *Umod*<sup>CE/+</sup>; *Manf*<sup>fl/fl</sup>:  $n = 3$ . One-way ANOVA with Tukey's multiple comparisons, Mean  $\pm$  SD. *Umod*<sup>DEL/+</sup>; *Umod*<sup>CE/+</sup>; *Manf*<sup>fl/fl</sup> vs *Umod*<sup>DEL/+</sup>; *Manf*<sup>fl/fl</sup>: \* $p = 0.019$  (NGAL), \*\* $p = 0.0017$  (FN). *Umod*<sup>DEL/+</sup>; *Manf*<sup>fl/fl</sup> vs WT: \* $p = 0.0459$  (NGAL). (c-e) All mice were given TAM at 5 weeks of age. Source data are provided as a source data file.



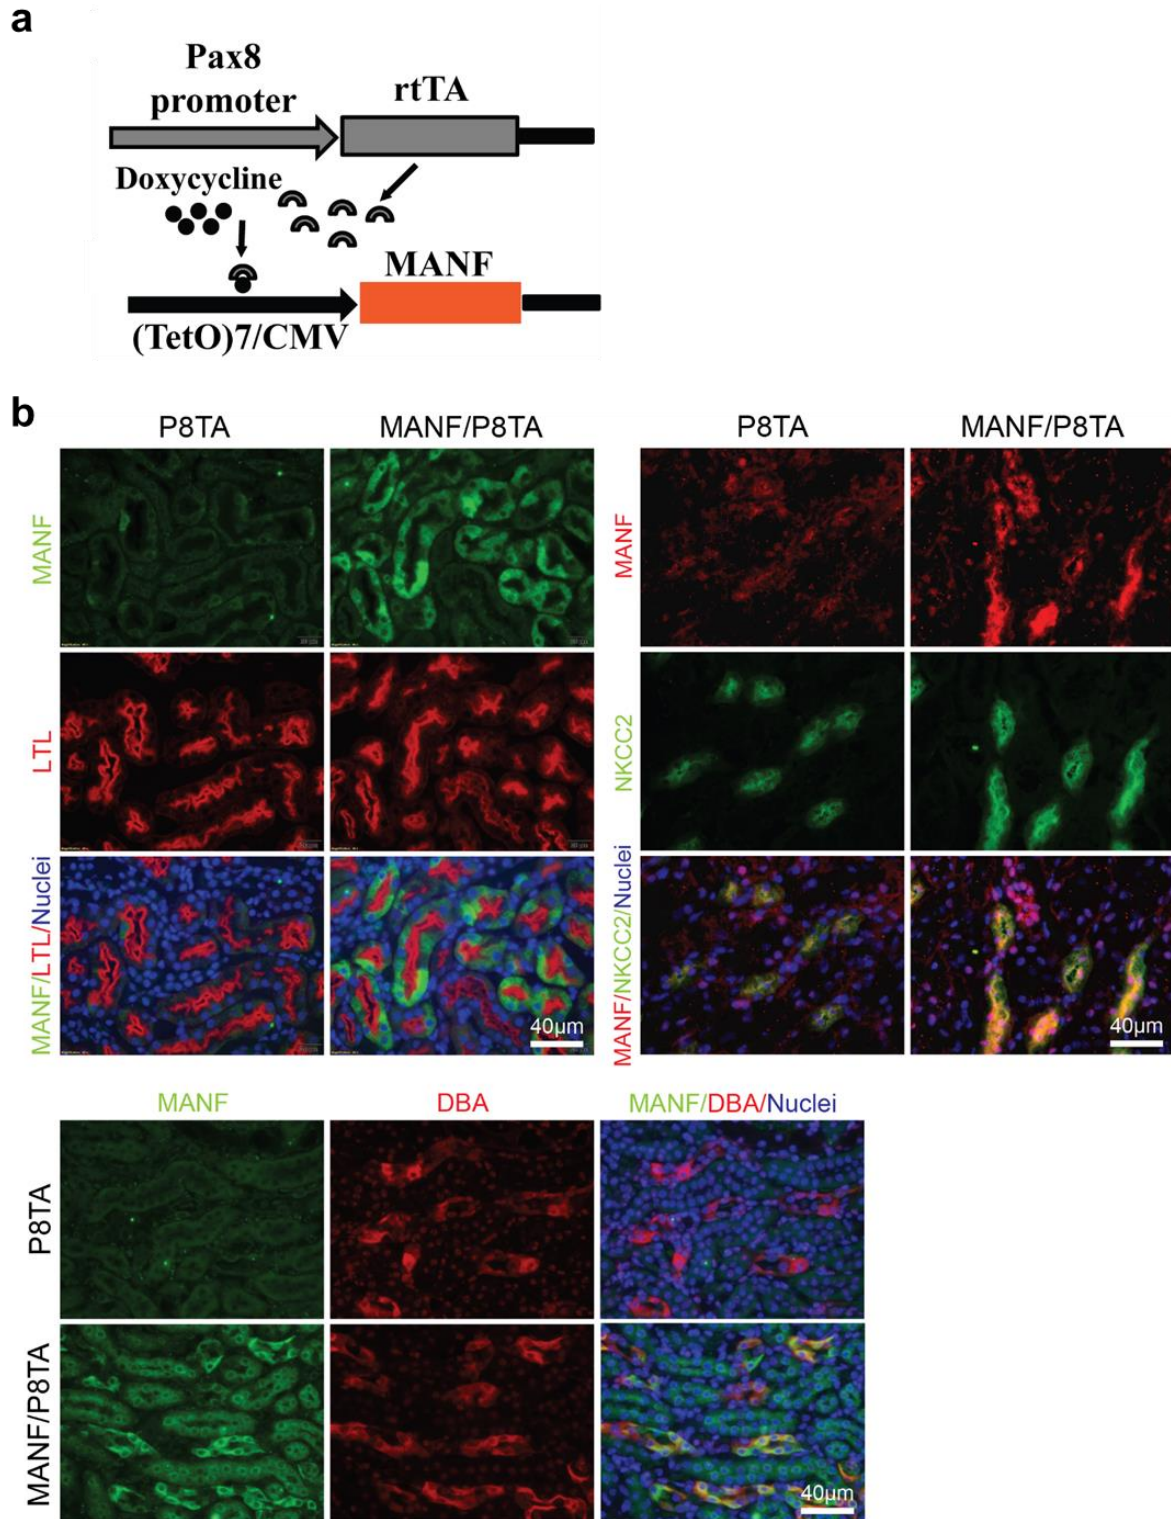

**Supplementary Fig. 10** Generation and characterization of inducible, renal tubular MANF transgenic mice.

**a** Diagram of the two constructs used in the Tg mouse lines for the generation of the Tet-On system. The Pax8 promoter directs expression of rtTA in all renal tubular epithelial cells, and the (TetO)7/CMV-MANF Tg is induced by DOX-bound rtTA. **b** Co-IF staining of MANF and LTL, or NKCC2 or DBA with nuclear counterstain on kidney sections of the indicated groups after 4 weeks of DOX administration. Scale bar, 40 µm.

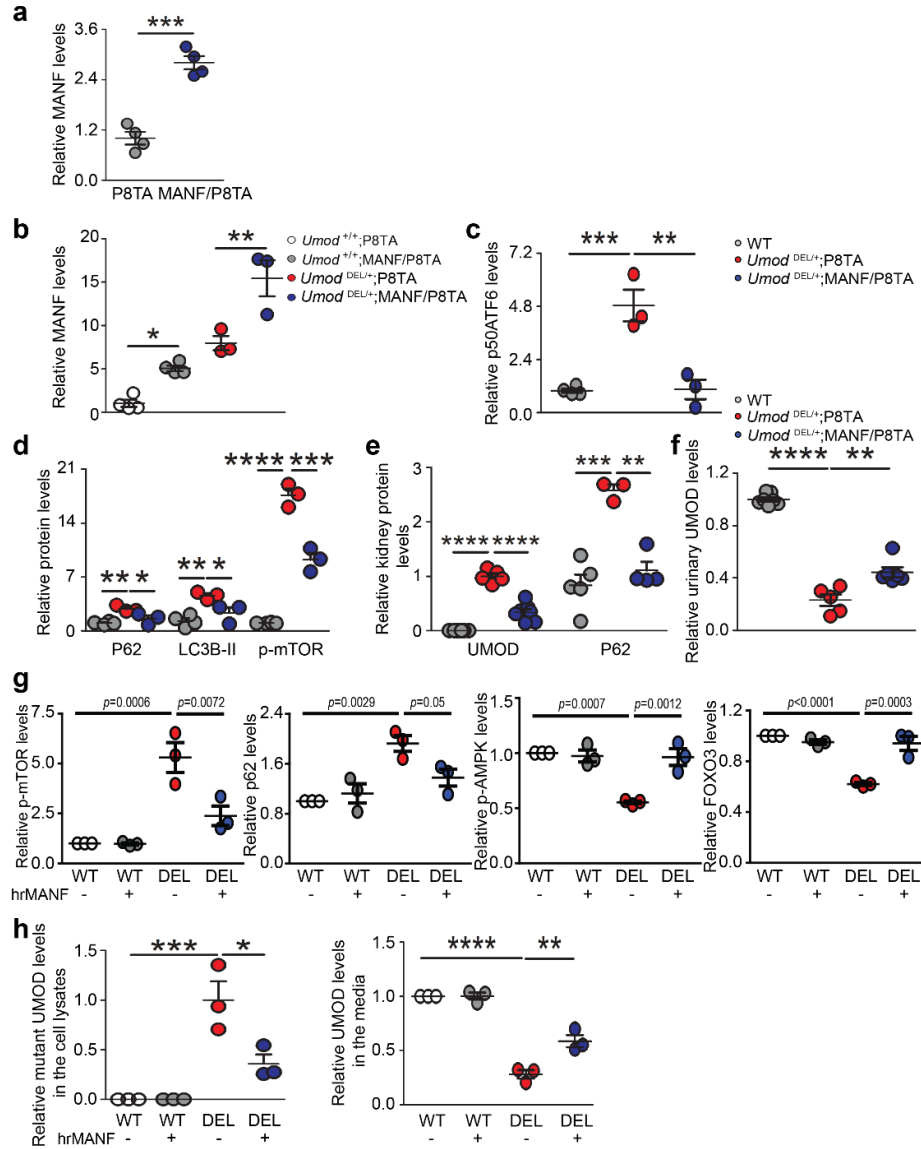

**Supplementary Fig. 11** MANF treatment *in vivo* and *in vitro* stimulates autophagy in ADTKD (densitometry analysis for Fig. 7).

**a** Densitometry analysis of MANF for Fig. 7d.  $n = 4/\text{genotype}$ . Two-tailed  $t$ -test, Mean  $\pm$  SD.  $***p = 0.0002$ . **b** Densitometry analysis of MANF for Fig. 7f.  $Umod^{+/+};P8TA: n = 4$ ,  $Umod^{+/+};MANF/P8TA: n = 4$ ,  $Umod^{DEL/+};P8TA: n = 3$ ,  $Umod^{DEL/+};MANF/P8TA: n = 3$ . One-way ANOVA with Tukey's multiple comparisons, Mean  $\pm$  SD.  $*p = 0.0433$ ,  $**p = 0.0025$ . **c** Densitometry analysis of p50ATF6 for Fig. 7h. WT:  $n = 4$ ,  $Umod^{DEL/+};P8TA: n = 3$ ,  $Umod^{DEL/+};MANF/P8TA: n = 3$ . One-way ANOVA with Tukey's multiple comparisons, Mean  $\pm$  SD.  $**p = 0.0015$ ;  $***p = 0.0009$ . **d** Densitometry analysis of p62, LC3B-II and p-mTOR for Fig. 7i. WT:  $n = 4$ ,  $Umod^{DEL/+};P8TA: n = 3$ ,  $Umod^{DEL/+};MANF/P8TA: n = 3$ . One-way ANOVA with Tukey's multiple comparisons, Mean  $\pm$  SD. P62:  $*p = 0.0302$ ,  $**p = 0.0033$ ; LC3B-II:  $*p = 0.0356$ ,  $**p = 0.0039$ ; p-mTOR:  $***p = 0.00011$ ;  $****p < 0.0001$ . **e** Densitometry analysis of UMOD and p62 for Fig. 7l. WT:  $n = 7$  (UMOD),  $n = 5$  (P62);  $Umod^{DEL/+};P8TA: n = 5$  (UMOD),  $n = 3$  (P62);  $Umod^{DEL/+};MANF/P8TA: n = 7$  (UMOD),  $n = 4$  (P62). One-way ANOVA with Tukey's multiple comparisons, Mean  $\pm$  SD.  $**p = 0.0012$ ;  $***p = 0.0002$ ;  $****p < 0.0001$ . **f** Densitometry analysis of urinary UMOD levels for Fig. 7m. WT:  $n = 7$ ,  $Umod^{DEL/+};P8TA: n = 5$ ,  $Umod^{DEL/+};MANF/P8TA: n = 6$ . One-way ANOVA with Tukey's multiple comparisons, Mean  $\pm$  SD.  $**p = 0.0013$ ;  $****p < 0.0001$ . **g** Densitometry analysis of p-mTOR, p62, p-AMPK and FOXO3 without or with hrMANF treatment for Fig. 7n.  $n = 3/\text{group}$ . One-way ANOVA with Tukey's multiple comparisons, Mean  $\pm$  SD. **h** Densitometry analysis of mutant UMOD levels in the cell lysates or WT UMOD levels in the media in the absence or presence of hrMANF for Fig. 7o.  $n = 3/\text{group}$ . One-way ANOVA with Tukey's multiple comparisons, Mean  $\pm$  SD.  $*p = 0.0124$ ;  $**p = 0.0019$ ;  $***p = 0.0007$ ;  $****p < 0.0001$ . (**a-f**) All mice were given DOX at 4 weeks of age. Source data are provided as a source data file.





**a**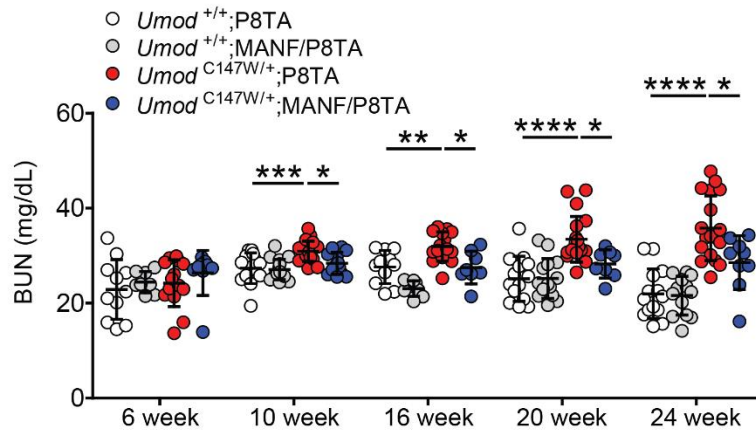**b**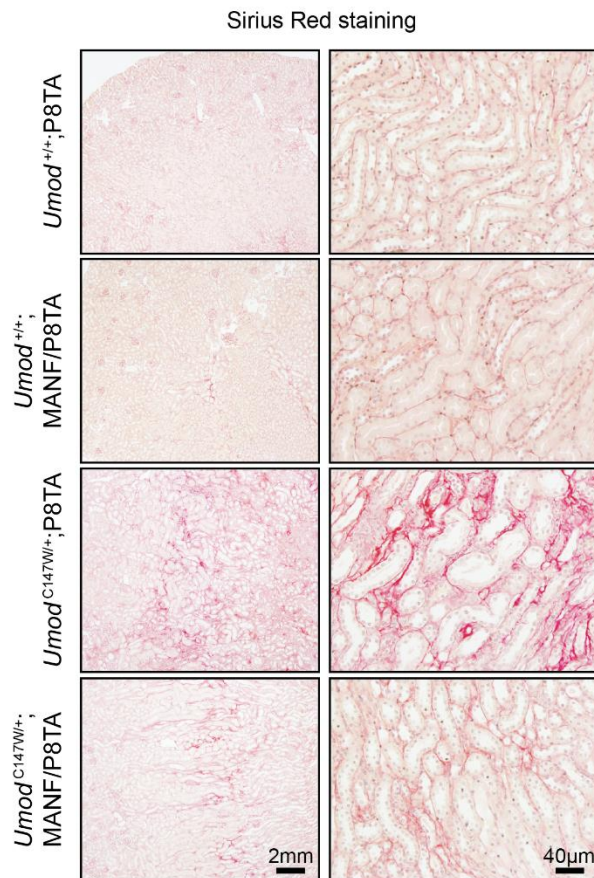

**Supplementary Fig. 13 Tubular MANF overexpression inhibits renal fibrosis and protects kidney function in *Umod*<sup>C147W/+</sup> mice.**

**a** BUN measurements in the indicated groups over a 24-week period. (at 6, 10, 16, 20 and 24 weeks,  $n = 11, 14, 11, 14, 14$  for *Umod*<sup>+/+</sup>;P8TA,  $n = 8, 16, 8, 14, 13$  for *Umod*<sup>+/+</sup>;MANF/P8TA,  $n = 14, 19, 15, 19, 18$  for *Umod*<sup>C147W/+</sup>;P8TA, and  $n = 9, 13, 8, 8, 9$  for *Umod*<sup>C147W/+</sup>;MANF/P8TA mice). One-way ANOVA with Tukey's multiple comparisons, Mean  $\pm$  SD. *Umod*<sup>C147W/+</sup>;MANF/P8TA vs *Umod*<sup>C147W/+</sup>;P8TA: \* $p = 0.0298$  (for 10 weeks), 0.011 (16 weeks), 0.0382 (20 weeks), 0.0147 (24 weeks). *Umod*<sup>C147W/+</sup>;P8TA vs WT: \*\* $p = 0.0055$  (16 weeks), \*\*\* $p = 0.0007$  (10 weeks), \*\*\*\* $p < 0.0001$  (20 and 24 weeks). All mice were given DOX starting from 6 weeks. **b** Representative histological images of whole kidney sections stained with Picrosirius red (collagens I/III in red) at 24 weeks. Scale bar, 2 mm or 40  $\mu$ m. Source data are provided as a source data file.

Uncropped blots for  
Supplementary Figure 1b

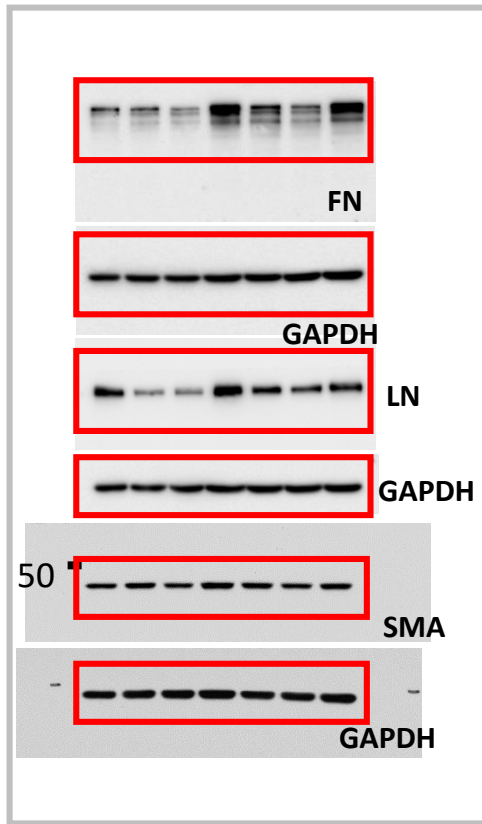

Uncropped blots for  
Supplementary Figure 1c

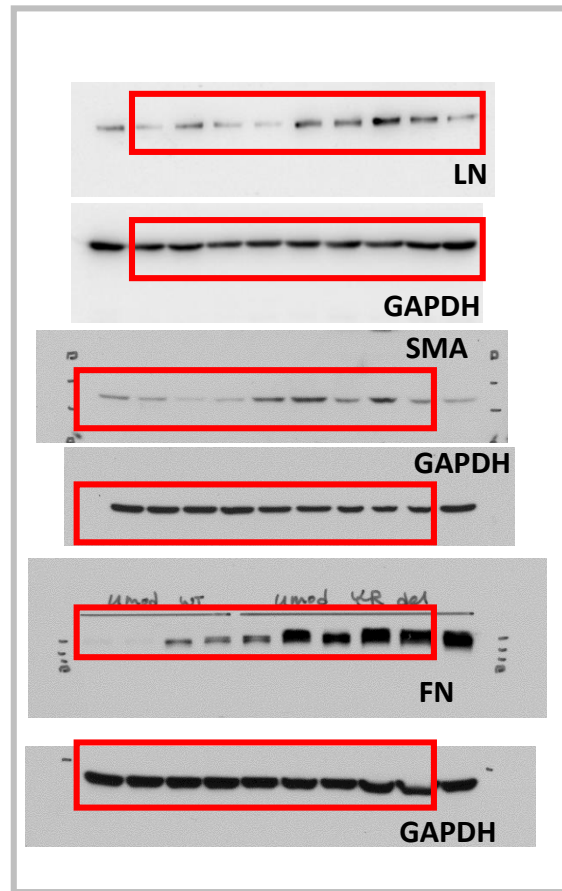

Uncropped blots for  
Supplementary Figure 2a

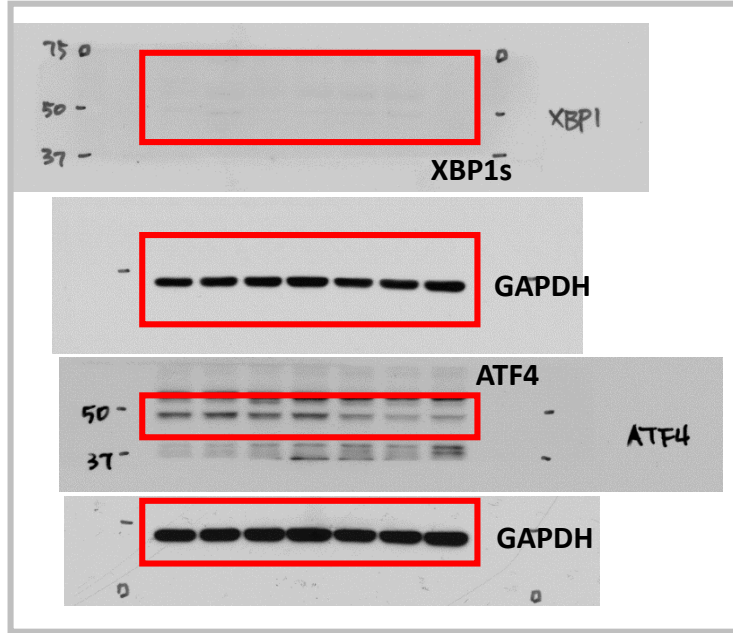

Uncropped blots for  
Supplementary Figure 2b

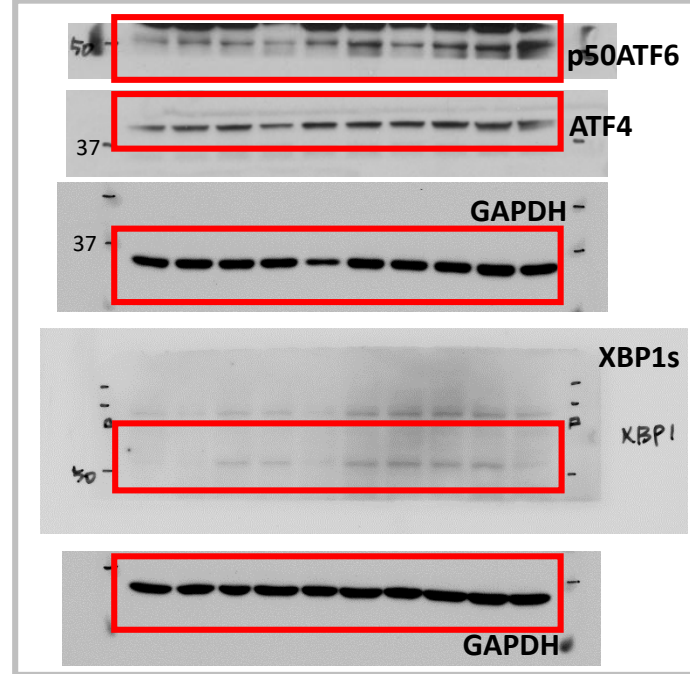

Uncropped blots for  
Supplementary Figure 2c

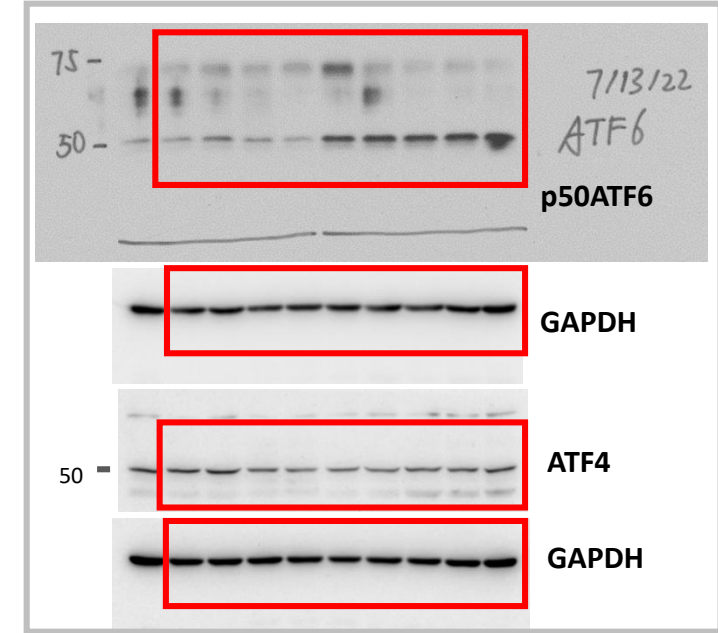

Uncropped blots for  
Supplementary Figure 2d

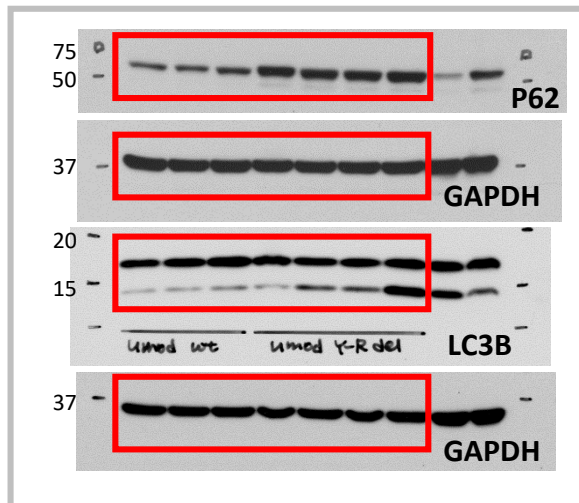

Uncropped blots for  
Supplementary Figure 2e

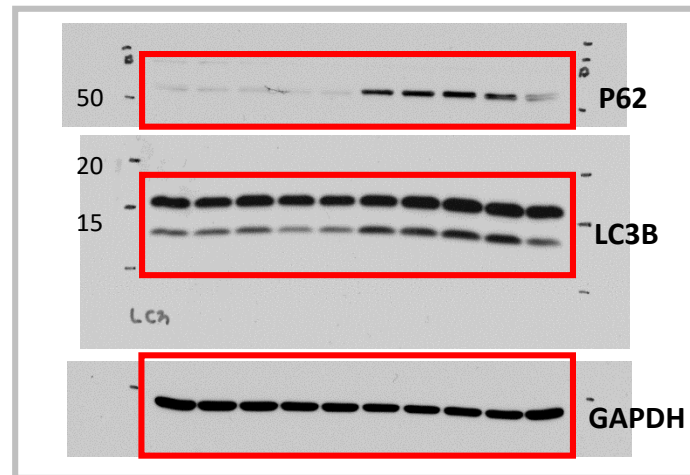

Uncropped blot for  
Supplementary Figure 9b

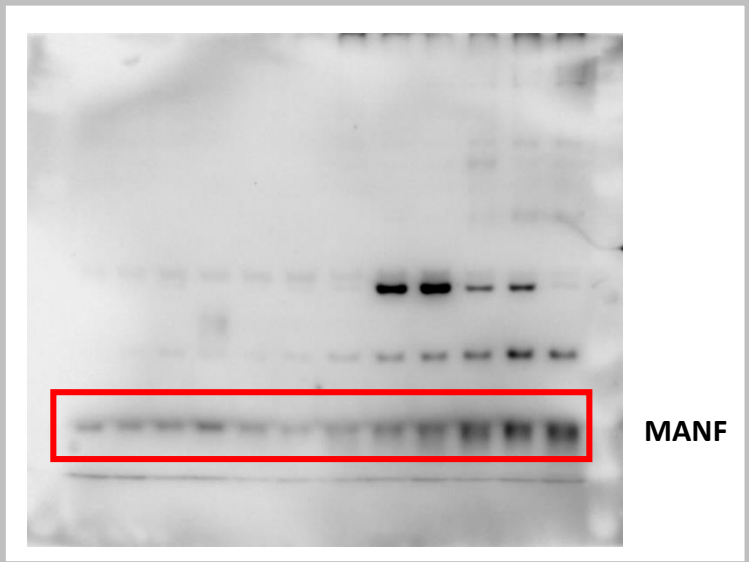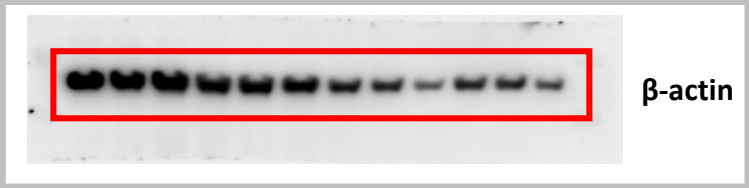

Supplement: 41467_2023_42154_MOESM1_ESM.pdf [file 41467_2023_42154_MOESM1_ESM.pdf]
